# Supplementary material for: CCL21/CCR7 Axis Contributes to Trophoblastic Cell Migration and Invasion in Preeclampsia by Affecting the Epithelial Mesenchymal Transition via the ERK1/2 Signaling Pathway
Source: MDPI journal article supplement (doi:10.3390/biology12020150), 2023-01-18
Supplement: s1 [file s1]

Figure 2B

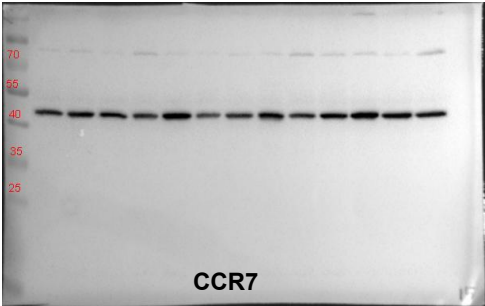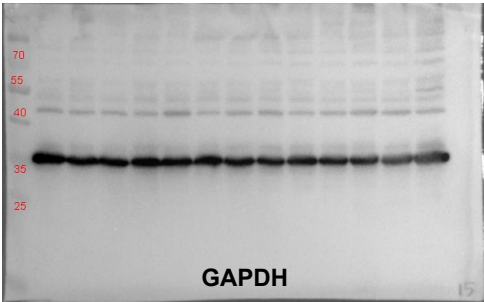

| Control  | PE       |
|----------|----------|
| 0.291248 | 0.641928 |
| 0.456164 | 0.391904 |
| 0.397083 | 0.602876 |
| 0.26815  | 1.011612 |
| 0.597102 | 0.731406 |
| 0.259087 | 0.435777 |
| 0.388753 |          |

Figure 3D

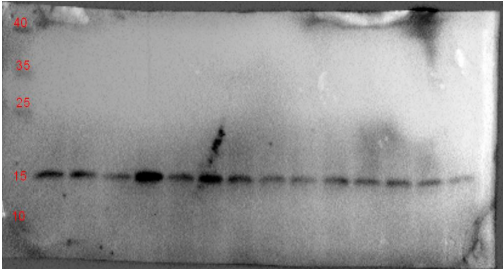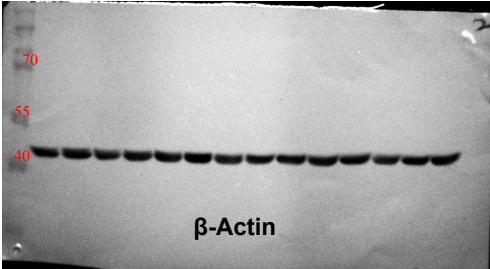

| Normal   | PE       |
|----------|----------|
| 1.28565  | 0.56815  |
| 1.03117  | 0.552082 |
| 0.921357 | 0.797873 |
| 1.703261 | 0.68447  |
| 1.028508 | 0.898443 |
| 1.410713 | 0.777093 |
| 1.135657 | 0.495765 |

Figure 3E

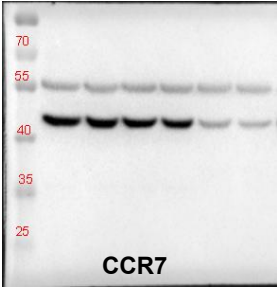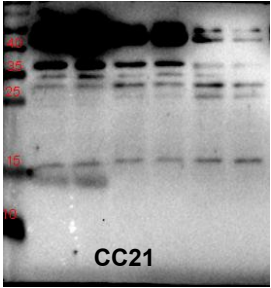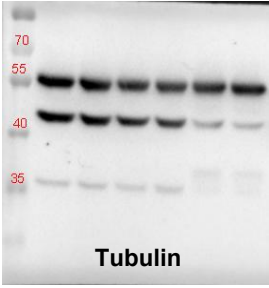

Figure 5F

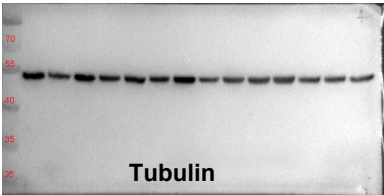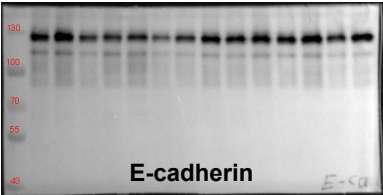

| Snail    |          |
|----------|----------|
| Normal   | PE       |
| 0.395969 | 0.287429 |
| 0.48671  | 0.365296 |
| 0.479341 | 0.386455 |
| 0.56262  | 0.32046  |
| 0.661809 | 0.338348 |
| 0.57046  | 0.434159 |

| Vimentin |          |
|----------|----------|
| Normal   | PE       |
| 1.685594 | 1.3932   |
| 1.853756 | 1.407364 |
| 2.05026  | 1.23943  |
| 1.669381 | 1.129572 |
| 1.588462 | 1.035679 |
| 1.493618 | 0.82752  |
| 1.239557 | 0.685699 |

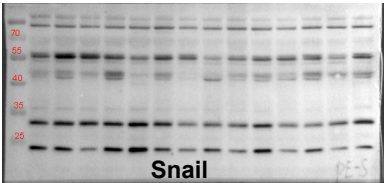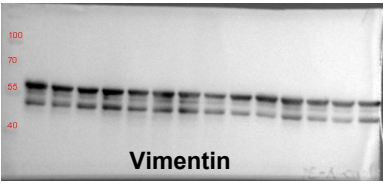

| E-cadherin |          |
|------------|----------|
| Normal     | PE       |
| 1.112858   | 1.569234 |
| 0.908247   | 1.337154 |
| 1.154082   | 1.296404 |
| 1.10443    | 1.163809 |
| 0.895297   | 1.528334 |
| 0.836967   | 1.172884 |
|            | 1.451145 |

| Snail    |          |
|----------|----------|
| Control  | CCL21    |
| 0.284063 | 0.46121  |
| 0.334974 | 0.448747 |
| 0.313442 | 0.425315 |

Figure 5A

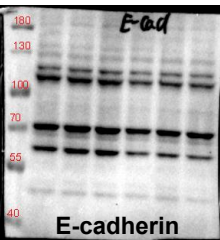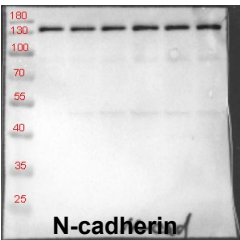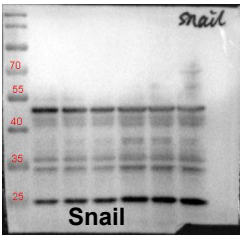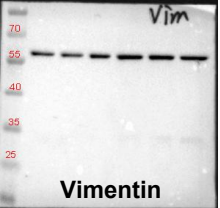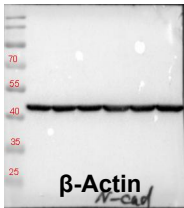

| E-cadherin |          | Vimentin |          | N-cadherin |          |
|------------|----------|----------|----------|------------|----------|
| Control    | CCL21    | Control  | CCL21    | Control    | CCL21    |
| 0.641161   | 0.398338 | 0.321548 | 0.7019   | 0.163073   | 0.208535 |
| 0.675784   | 0.48836  | 0.382307 | 0.824685 | 0.15084    | 0.197626 |
| 0.799359   | 0.4492   | 0.402928 | 0.581617 | 0.162247   | 0.199873 |

Figure 6A

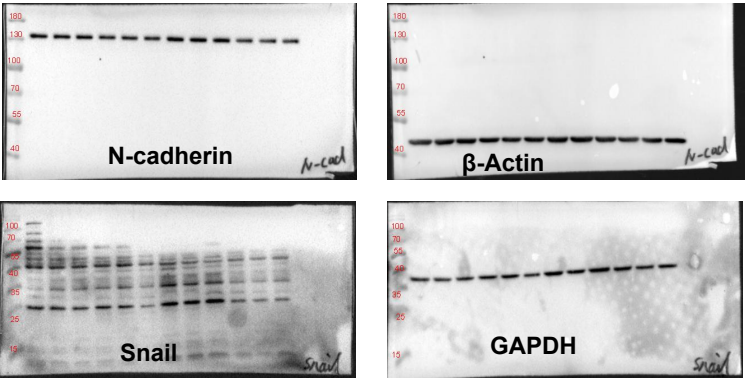

| N-cadherin |          |          |             |
|------------|----------|----------|-------------|
| NC         | CCR7i    | CCL21+NC | CCL21+CCR7i |
| 0.748822   | 0.603219 | 0.883277 | 0.663211    |
| 0.784198   | 0.656636 | 0.89184  | 0.661664    |
| 0.794111   | 0.696938 | 0.908547 | 0.560798    |

| Snail    |          |          |             |
|----------|----------|----------|-------------|
| NC       | CCR7i    | CCL21+NC | CCL21+CCR7i |
| 0.701814 | 0.672218 | 1.055934 | 0.4191      |
| 0.731083 | 0.632459 | 0.879658 | 0.399393    |
| 0.594361 | 0.351746 | 0.988308 | 0.363198    |

Figure 7A

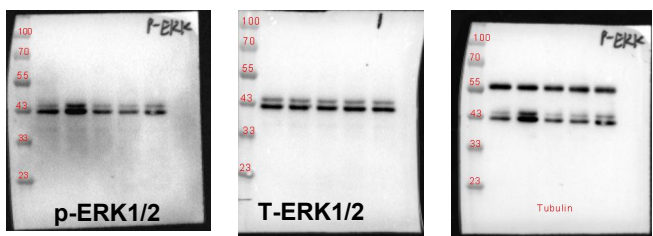

| 0h       | 2h       | 6h       | 12h      | 24h      |
|----------|----------|----------|----------|----------|
| 0.728963 | 1.285584 | 0.708027 | 0.784534 | 0.666403 |
| 0.656526 | 1.339321 | 0.7879   | 0.795496 | 0.826366 |
| 0.656954 | 1.201061 | 0.823084 | 0.720609 | 0.743782 |

Figure 7C

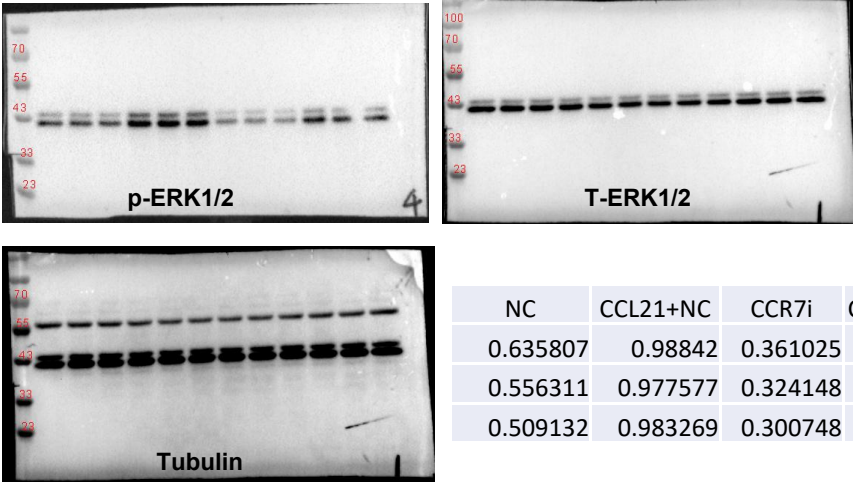

| NC       | CCL21+NC | CCR7i    | CCL21+CCR7i |
|----------|----------|----------|-------------|
| 0.635807 | 0.98842  | 0.361025 | 0.62777     |
| 0.556311 | 0.977577 | 0.324148 | 0.445157    |
| 0.509132 | 0.983269 | 0.300748 | 0.508359    |

Figure 7E

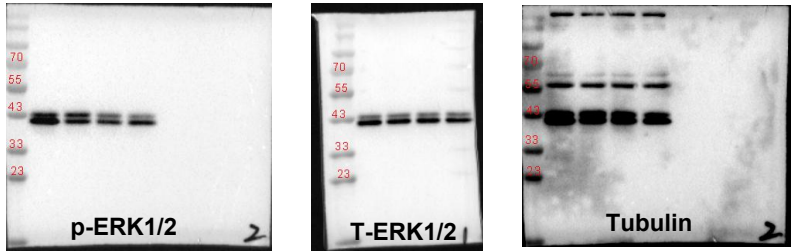

| Vehicle  | 10nM     | 50nM     | 100nM    |
|----------|----------|----------|----------|
| 1.039701 | 0.854311 | 0.835369 | 0.785423 |
| 1.068244 | 0.888843 | 0.812899 | 0.755182 |
| 1.044674 | 0.944521 | 0.767445 | 0.783075 |

Figure 7G

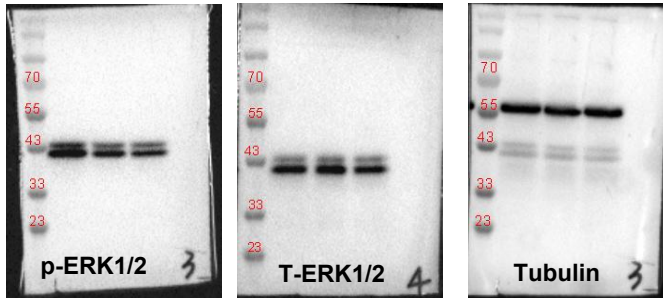

| Vehicle  | 24h      | 48h      |
|----------|----------|----------|
| 1.35605  | 0.95225  | 0.942731 |
| 1.447274 | 0.967477 | 0.918665 |
| 1.277405 | 0.897841 | 0.983769 |

Figure 7I

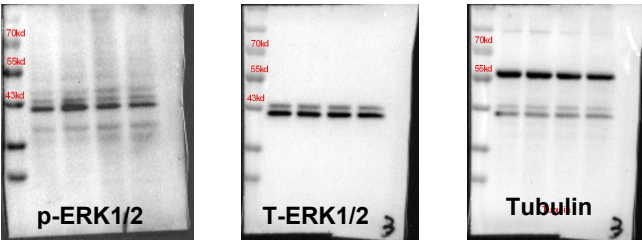

| Vehicle  | CCL21    | ERKi     | CCL21+ERKi |
|----------|----------|----------|------------|
| 0.395562 | 0.620198 | 0.363412 | 0.451157   |
| 0.437295 | 0.649172 | 0.40804  | 0.385085   |
| 0.458027 | 0.674349 | 0.403899 | 0.559974   |

Figure 7K

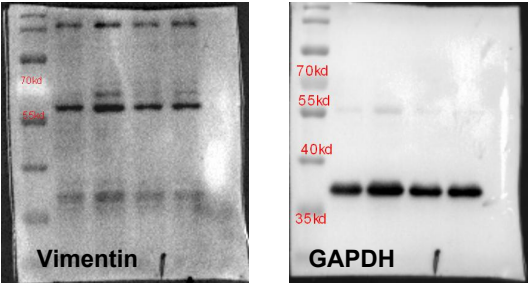

| Vimentin |          |          |            |
|----------|----------|----------|------------|
| Vehicle  | CCL21    | ERKi     | CCL21+ERKi |
| 0.13633  | 0.269409 | 0.211734 | 0.194684   |
| 0.157265 | 0.395797 | 0.177696 | 0.148229   |
| 0.157231 | 0.354074 | 0.160053 | 0.167217   |

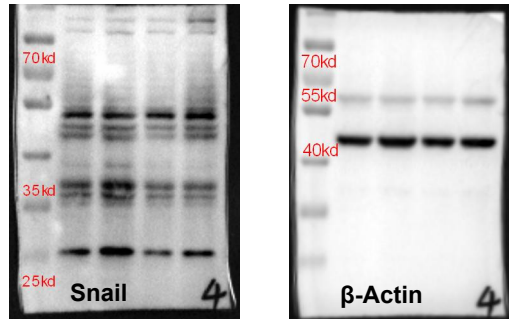

| Snail    |          |          |            |
|----------|----------|----------|------------|
| Vehicle  | CCL21    | ERKi     | CCL21+ERKi |
| 0.161554 | 0.381387 | 0.150032 | 0.244283   |
| 0.250928 | 0.530463 | 0.287513 | 0.272833   |
| 0.197854 | 0.4363   | 0.150185 | 0.272509   |

Figure 8G

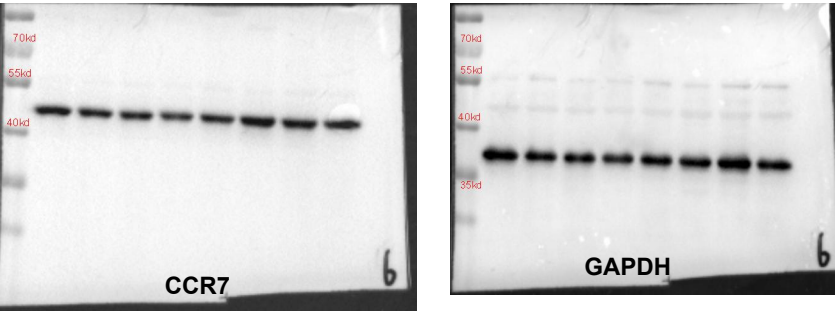

| Saline   | L-NAME   |
|----------|----------|
| 0.660681 | 0.797691 |
| 0.734414 | 1.08142  |
| 0.686694 | 0.808839 |
| 0.686626 | 0.878995 |

Figure 8I

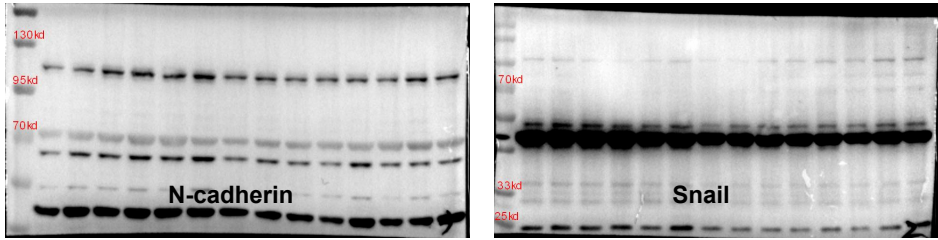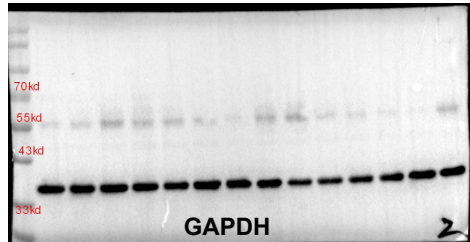

| Saline   | L-NAME   |
|----------|----------|
| 0.499753 | 0.268486 |
| 0.517753 | 0.390235 |
| 0.466847 | 0.324383 |
| 0.564486 | 0.422041 |
| 0.453538 | 0.249948 |
| 0.619499 | 0.330558 |
| 0.332764 | 0.420454 |

| Saline   | L-NAME   |
|----------|----------|
| 0.52349  | 0.490132 |
| 0.41197  | 0.494896 |
| 0.569793 | 0.528697 |
| 0.699446 | 0.473984 |
| 0.708625 | 0.353188 |
| 0.717737 | 0.424255 |
| 0.521859 | 0.423438 |



Figure S1D

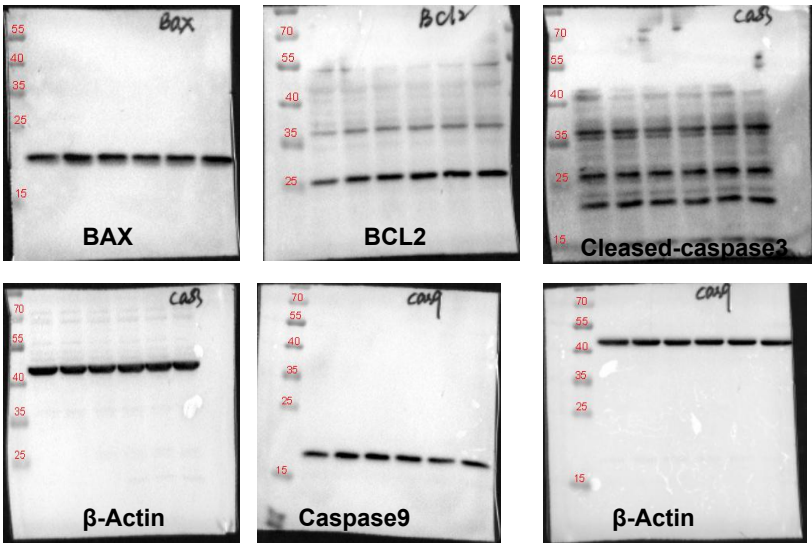

| BAX      |          |
|----------|----------|
| Control  | CCL21    |
| 1.045413 | 1.113743 |
| 1.262941 | 1.150391 |
| 1.331803 | 1.184409 |

| BCL2     |          |
|----------|----------|
| Control  | CCL21    |
| 0.363811 | 0.593786 |
| 0.513787 | 0.563593 |
| 0.561962 | 0.620023 |

| Caspase9 |          |
|----------|----------|
| Control  | CCL21    |
| 0.702412 | 0.943435 |
| 0.990565 | 0.710355 |
| 1.069646 | 0.808954 |

| Cleaved-caspase3 |          |
|------------------|----------|
| Control          | CCL21    |
| 0.53113          | 0.584092 |
| 0.68117          | 0.531687 |
| 0.655528         | 0.656139 |

Figure S2B

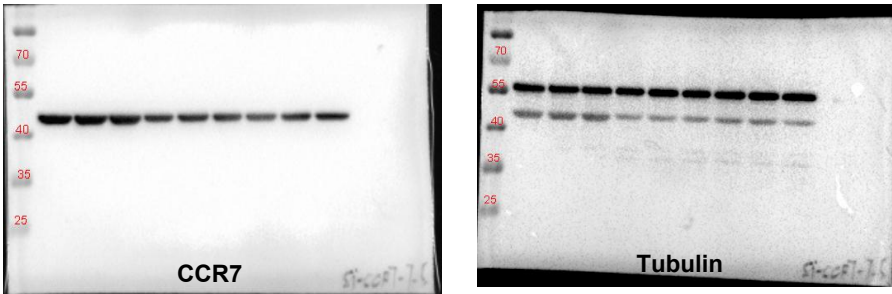

| CCR7     |          |          |
|----------|----------|----------|
| si-NC    | si-1#    | si-2#    |
| 2.772426 | 1.296841 | 0.982969 |
| 2.982288 | 1.275974 | 1.119487 |
| 2.707403 | 1.173446 | 1.289097 |
